# Supplementary material
Source: Springer Nature journal article supplement (https://www.springermedizin.de/resource/supplementary/12916_2009_190_MOESM2_ESM.pdf/9599356)
Supplement: MOESM2 [file 9599356]

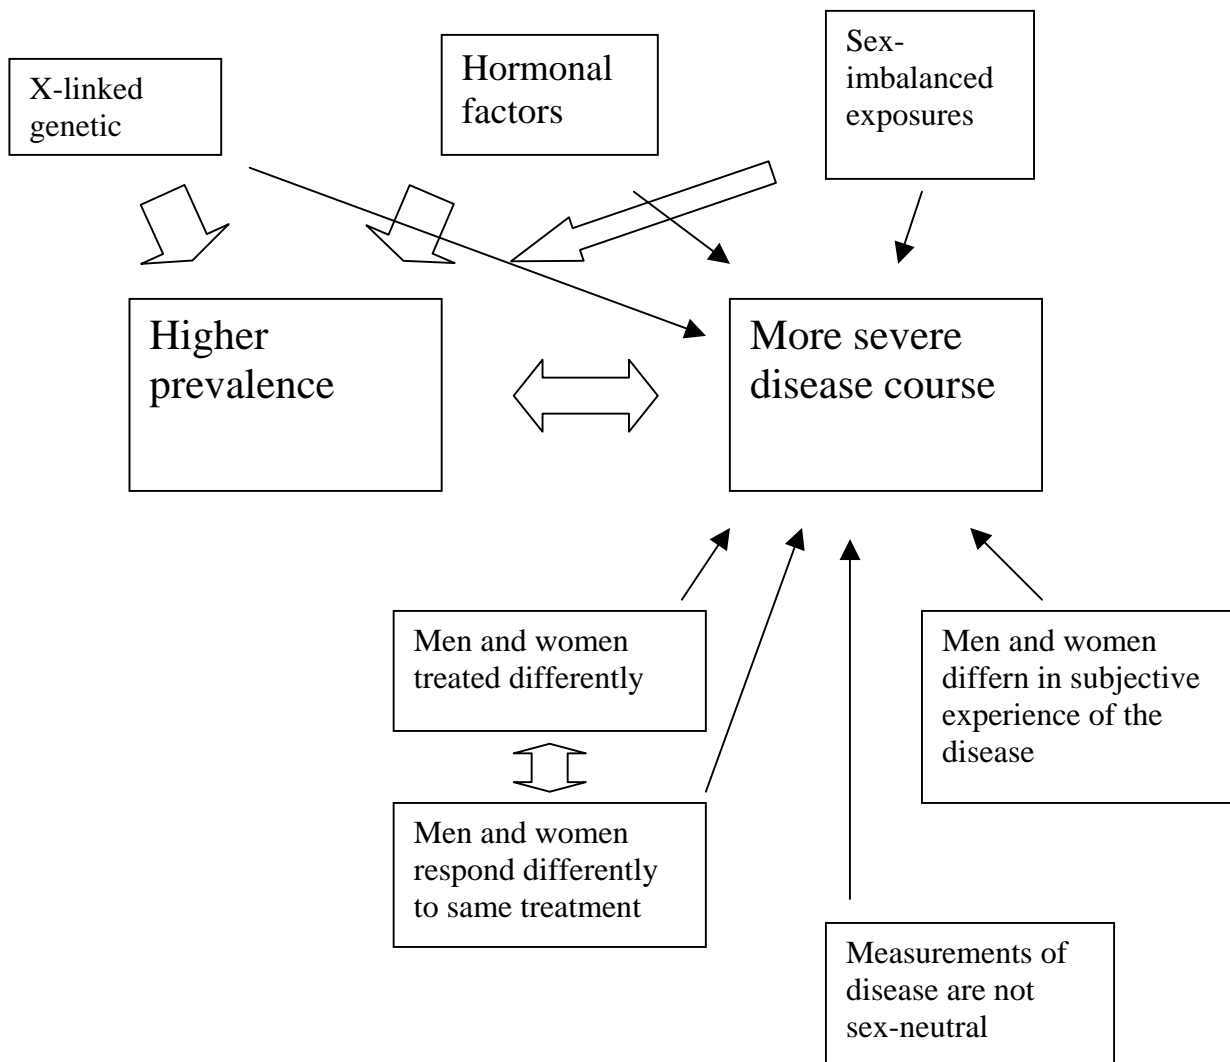

X-linked genetic

Hormonal factors

Sex-imbalanced exposures

Higher prevalence

More severe disease course

Men and women treated differently

Men and women differ in subjective experience of the disease

Men and women respond differently to same treatment

Measurements of disease are not sex-neutral
